# Supplementary material for: Tespa1 regulates T cell receptor-induced calcium signals by recruiting inositol 1,4,5-trisphosphate receptors
Source: PubMed Central journal article supplement (PMC5472764; doi:10.1038/ncomms15732), 2017-06-09
Supplement: ncomms15732-s1.pdf [file ncomms15732-s1.pdf]

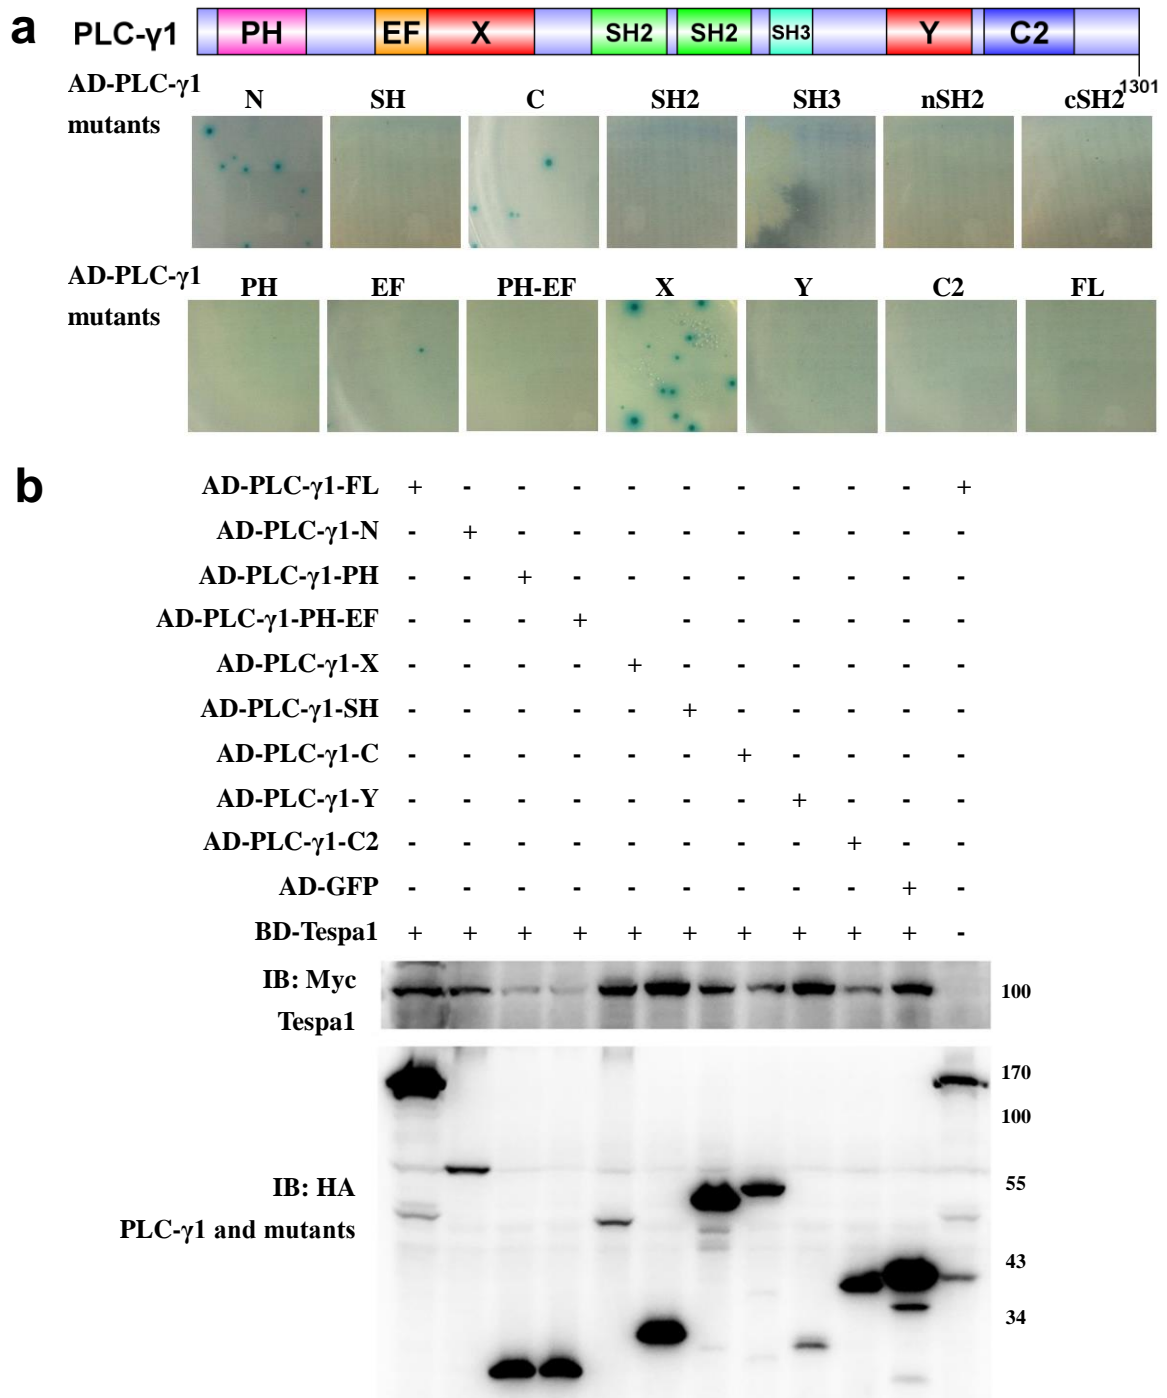

**Supplementary Figure 1. Tespa1 interacts directly with PLC- $\gamma$ 1.** (a) Interaction between pGBKT7-Tespa1 and pGADT7-PLC- $\gamma$ 1 or its different mutants in a two-hybrid system. The presence of clones on SD/-Trp-Leu-Ade-His/X- $\alpha$ -Gal/AbA (QDO/X/A) plates indicates an interaction between the bait and prey proteins. (b) Co-expression of pGBKT7-Tespa1 with pGADT7-PLC- $\gamma$ 1 or its different mutants in yeast, as detected by immunoblotting with anti-Myc and anti-HA antibodies. Data are representative of at least three experiments.

**a**

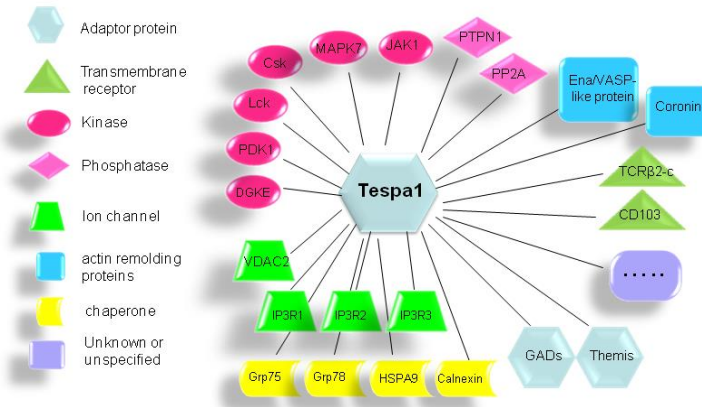

**b**

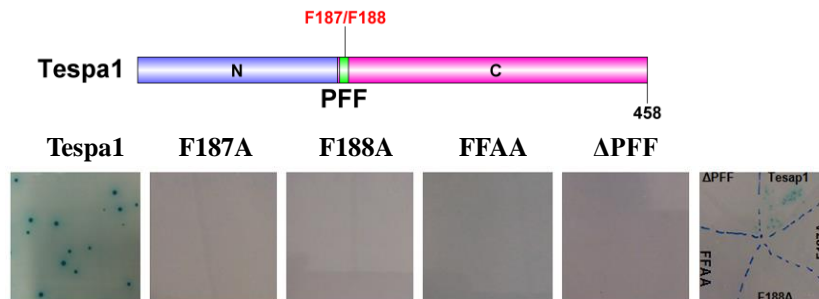

**c**

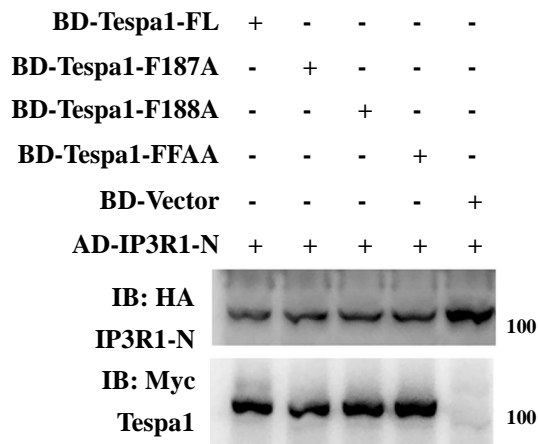

**Supplementary Figure 2. Tespa1 interacts directly with IP3R1.** (a) The network of Tespa1-interacting proteins isolated by immunoprecipitation with anti-Flag beads from Jurkat cells transfected with Flag-tagged Tespa1 and left unstimulated or stimulated for 5 min with anti-CD3 and anti-CD28. The immunoprecipitated proteins were analyzed by mass spectrometry, then classified according to function (left margin), such as adaptor protein, transmembrane receptor, tyrosine or serine-threonine protein kinase (Kinase), phospholipid or tyrosine phosphatase (Phosphatase), ion channel, actin remodeling protein, or chaperone. (b) Interaction between pGBKT7-Tespa1 or its different mutants and pGADT7-IP3R1-N (1-610) in a two-hybrid system. The presence of clones on SD/-Trp-Leu-Ade-His/X- $\alpha$ -Gal/AbA (QDO/X/A) plates indicates an interaction between the bait and prey proteins. (c) Co-expression of pGBKT7-Tespa1 or its different mutants with pGADT7-IP3R1-N (1-610) in yeast, as detected by immunoblotting with anti-Myc and anti-HA antibodies.

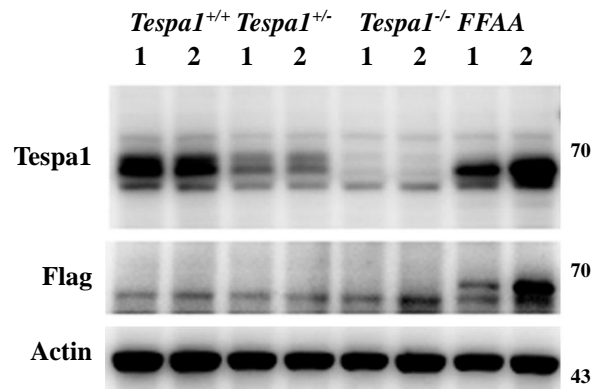

**Supplementary Figure 3. Expression of the *Tespa1*-FFAA mutant in thymocytes.** Immunoblotting was used to determine *Tespa1* protein expression in sorted DP thymocytes from *Tespa1*<sup>+/+</sup>, *Tespa1*<sup>+/-</sup>, *Tespa1*<sup>-/-</sup>, and *Tespa1*-FFAA mice expressing Flag-*Tespa1*-FFAA. 1 and 2 indicate two different mice.

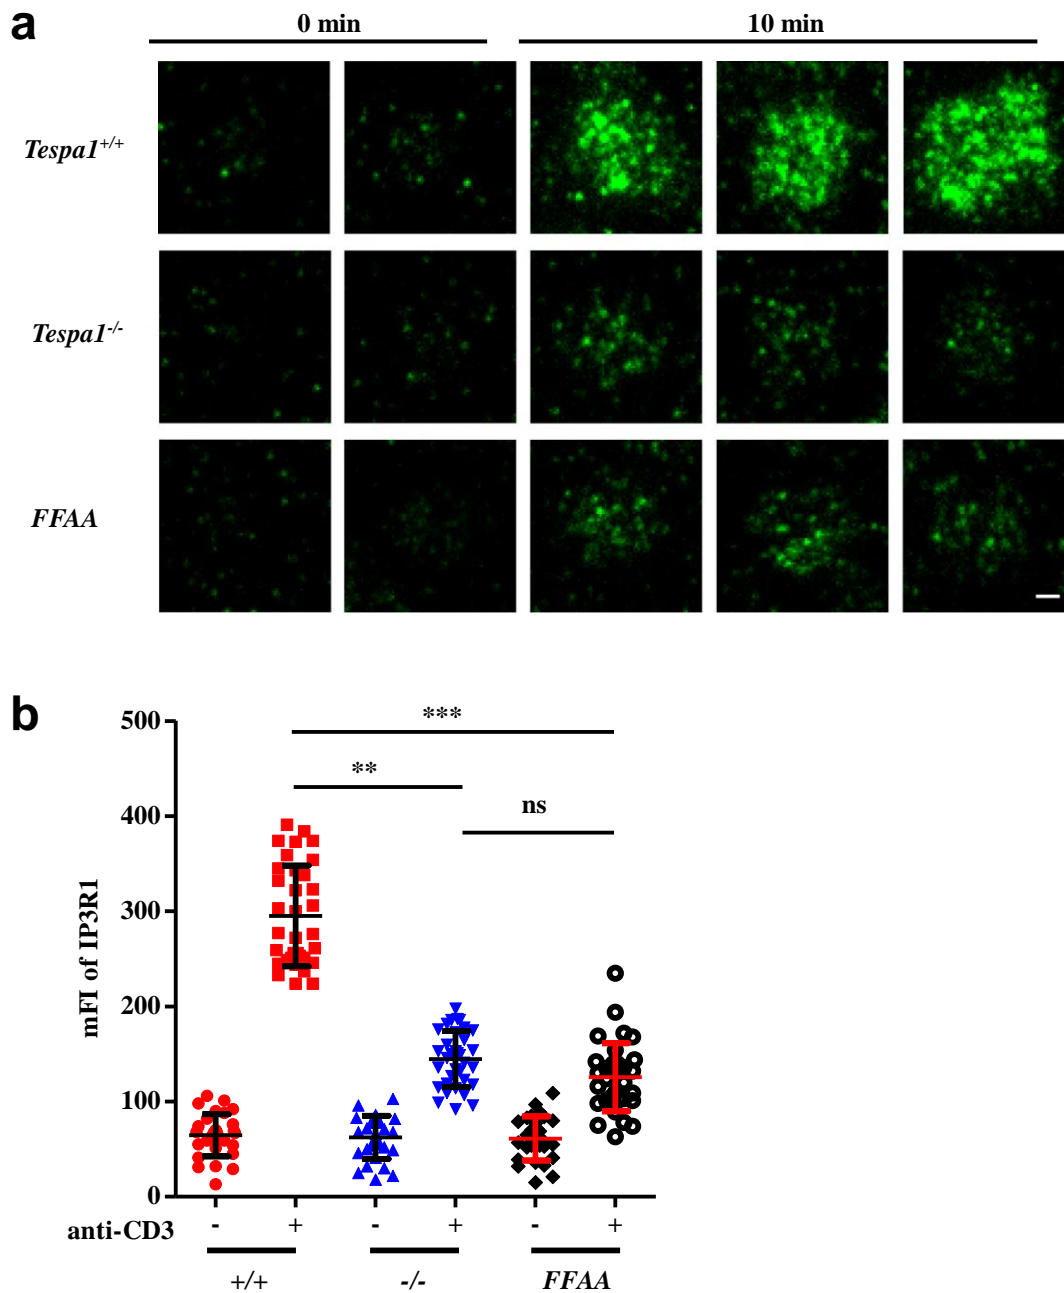

**Supplementary Figure 4. Defective recruitment of IP3R1 to TCR-proximal region in *Tespa1*<sup>-/-</sup> and *Tespa1*-*FFAA* T cells.** (a) Representative TIRFM images of IP3R1 (green) into the interface of T cells and the anti-CD3 coated coverslips in *Tespa1*<sup>+/+</sup>, *Tespa1*<sup>-/-</sup> and *Tespa1*-*FFAA* T cells. Cells were activated for indicated times by anti-CD3-coated cover slips. Two (0 min) or three (10 min) representative cells are shown. Scale bar. 1.5  $\mu$ m. (b) Mathematical quantifications for accumulation in mFI of IP3R1 microclusters are shown (n=34 for all stimulated groups from +/+, -/-, *FFAA*, n=30 for unstimulated group from +/+, -/- and n=28 for unstimulated group from *FFAA*). Three independent experiments with each dot represent the value of one cell. Small horizontal lines indicate mean  $\pm$  s.d. One-way ANOVA was performed with a p value included. \*p < 0.05, \*\*p < 0.01, \*\*\*p < 0.001, ns, not significant.

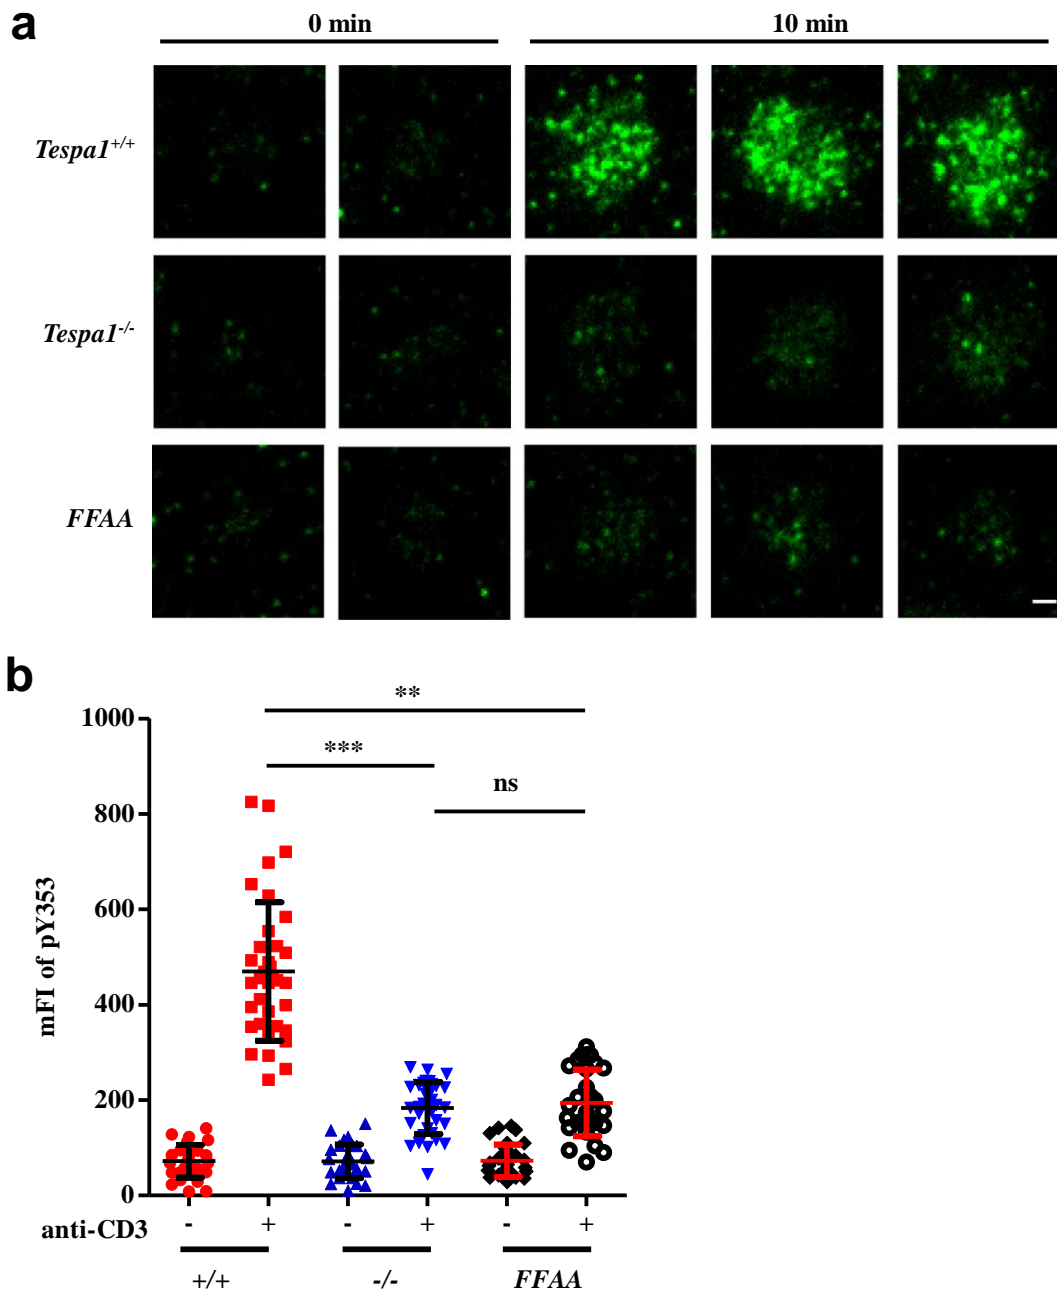

**Supplementary Figure 5. Requirement of *Tespa1* for Y353 phosphorylation of IP3R1.** (a) Representative TIRFM images of IP3R1 pY353 (green) into the interface of T cells and the anti-CD3 coated coverslips in *Tespa1*<sup>+/+</sup>, *Tespa1*<sup>-/-</sup> and *Tespa1*-FFAA T cells. Cells were activated for indicated times by anti-CD3-coated cover slips. Two (0 min) or three (10 min) representative cells are shown. Scale bar. 1.5  $\mu$ m. (b) Mathematical quantifications for accumulation in mFI of pY353 microclusters are shown (n=30 for unstimulated groups from +/+, -/-, FFAA and stimulated group from FFAA, n=35 for stimulated groups from +/+, -/-). Three independent experiments with each dot represent the value of one cell. Small horizontal lines indicate mean  $\pm$  s.d. One-way ANOVA was performed with a p value included.\*p <0.05, \*\*p < 0.01, \*\*\*p<0.001, ns, not significant.

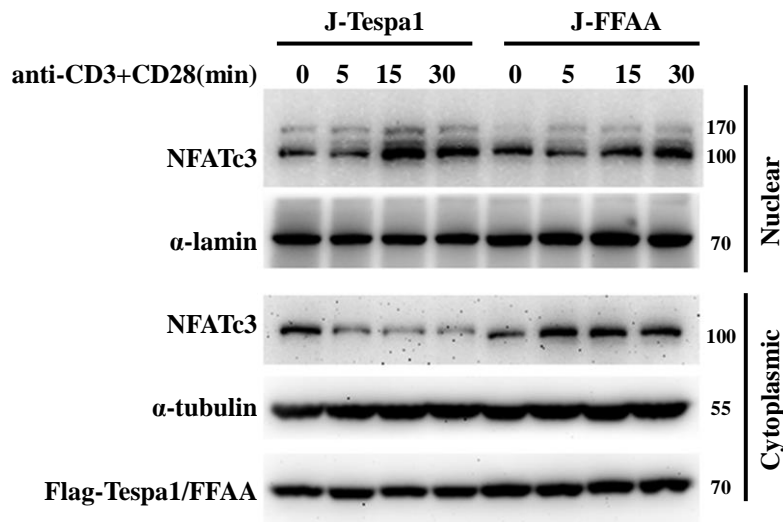

**Supplementary Figure 6. Impaired translocation of NFAT1 from the cytoplasm to the nucleus in J-FFAA cells.** Immunoblots (IB) of cytoplasmic and nuclear fractions of J-Tespa1, J-FFAA, and J-Vector cells left unstimulated or stimulated with anti-CD3 and anti-CD28 antibodies (each at  $5 \mu\text{g ml}^{-1}$ ) for the indicated times and probed with anti-NFATc3. Fractions were also immunoblotted with  $\alpha$ -tubulin and  $\alpha$ -lamin antibodies to confirm the purity of the cytoplasmic and nuclear fractions.

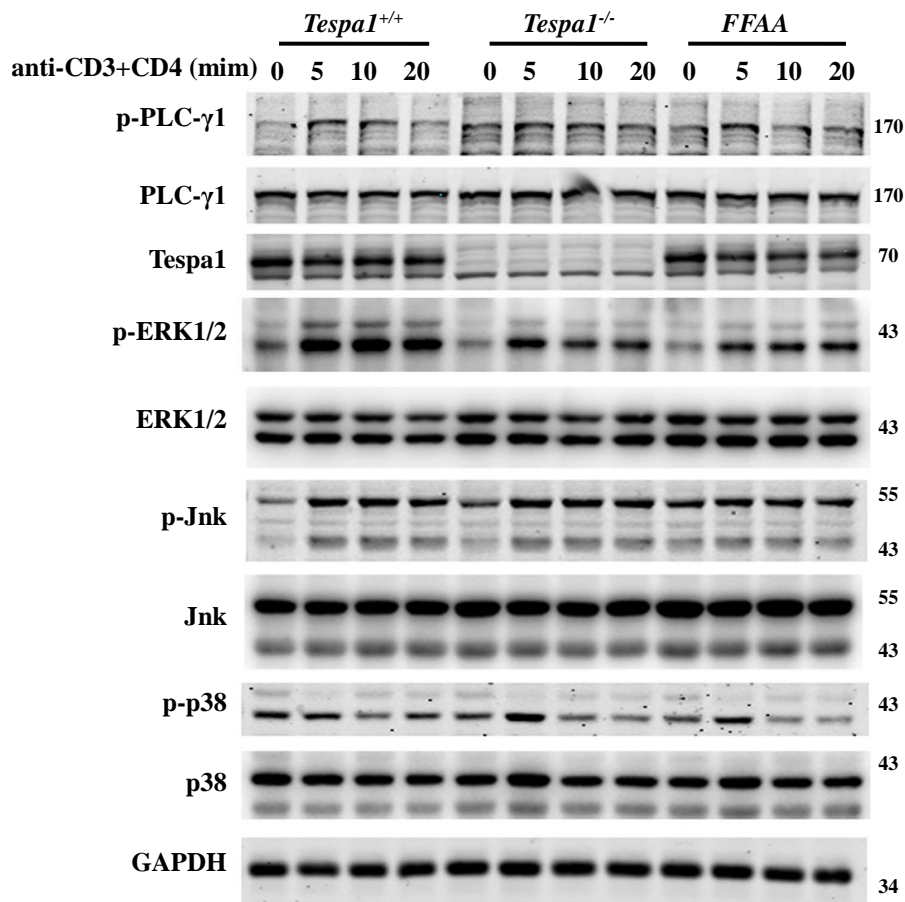

**Supplementary Figure 7. Interruption of TCR-driven ERK activation in *Tespa1-FFAA* thymocytes.** Immunoblots of p-PLC-γ1, p-ERK1/2, ERK1/2, p-p38, p38, p-JNK, and JNK in cell extracts from sorted *Tespa1*<sup>+/+</sup>, *Tespa1*<sup>-/-</sup>, and *Tespa1-FFAA* DP thymocytes left unstimulated (0) or stimulated for 5, 10, or 20 min with anti-CD3 and anti-CD4. Data are representative of >3 independent experiments.

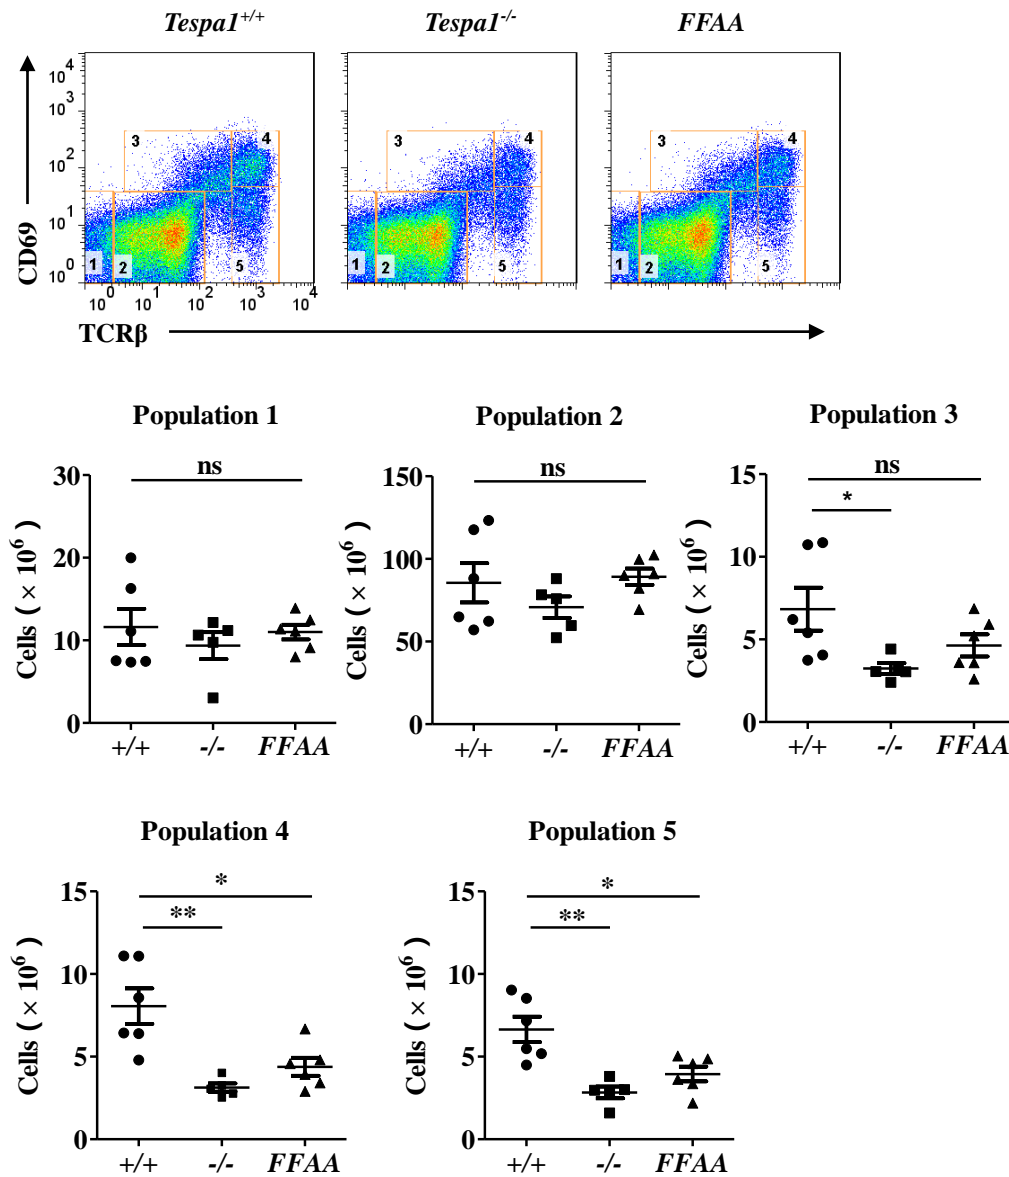

**Supplementary Figure 8. Impaired positive selection in *Tespa1*-*FFAA* mice.** Flow cytometric analysis of the surface expression of CD69 and TCRβ on *Tespa1*<sup>+/+</sup>, *Tespa1*<sup>-/-</sup>, and *Tespa1*-*FFAA* thymocytes; bottom, quantification of each subpopulation. \*P < 0.05, \*\*P < 0.01, ns, not significant (two-tailed t-test). Each symbol (a, c) represents an individual mouse; small horizontal lines indicate the mean (and s.d.). Data are representative of three independent experiments with 5-6 mice per group as the dots indicated



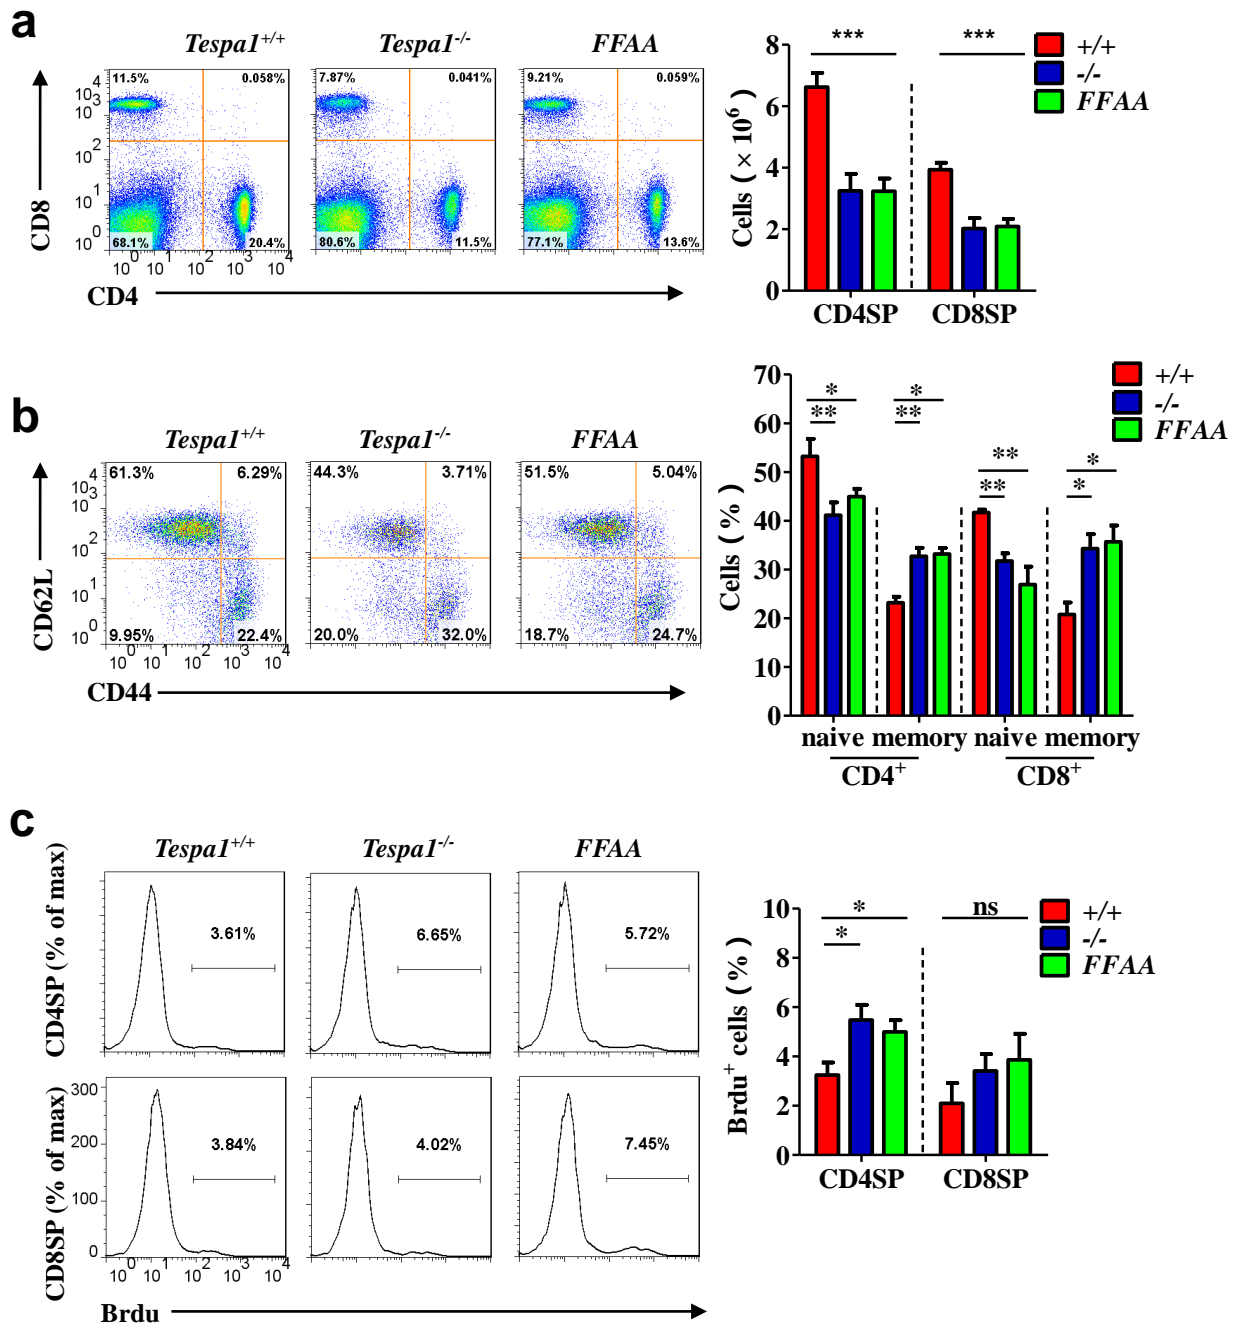

**Supplementary Figure 9. Phenotype of peripheral T cells in *Tespa1-FFAA* mice.** (a) Surface staining of CD4 and CD8 on *Tespa1*<sup>+/+</sup>, *Tespa1*<sup>-/-</sup>, and *Tespa1-FFAA* splenocytes (left) and percentages (middle) and total cell numbers (right, upper panel) of splenocyte subpopulations (n=7 for +/+, n=6 for -/- and n=8 for *FFAA*). (b) Expression of CD62L and CD44 on CD4<sup>+</sup> splenocytes from *Tespa1*<sup>+/+</sup>, *Tespa1*<sup>-/-</sup>, and *Tespa1-FFAA* mice (left), and frequency of CD62L<sup>hi</sup>CD44<sup>lo</sup> and CD62L<sup>lo</sup>CD44<sup>hi</sup> subpopulations in the CD4<sup>+</sup> and CD8<sup>+</sup> populations (right). n=4 for +/+, -/-, n=3 for *FFAA*. (c). BrdU uptake by CD4<sup>+</sup> or CD8<sup>+</sup> cells among *Tespa1*<sup>+/+</sup>, *Tespa1*<sup>-/-</sup> and *Tespa1-FFAA* splenocytes (left). Right, frequency of BrdU<sup>+</sup> CD4<sup>+</sup> and CD8<sup>+</sup> cells. \*P < 0.05, \*\*P < 0.01 and \*\*\*P < 0.001 (two-tailed t-test). n=5 for +/+, -/- and *FFAA*. Data are representative of three independent experiments (error bars indicate s.d.)

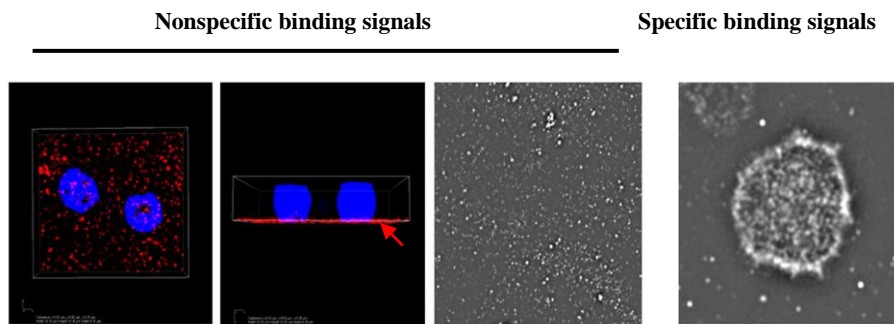

**Supplementary Figure. 10. 3D display of the methods used to identify the focal plane.** Cells were treated and stained with different antibodies as described in the Methods. We set up a control group of cells stained only with secondary antibodies; nuclei were stained with DAPI (blue). The focal plane (the red arrow) was identified by nonspecific binding signals (red dots) between the secondary antibody and the coverslips (left two pictures). In this group, there were no specific signals for the primary antibodies in the focal plane (the third picture). In the experimental group, the specific signals for the primary antibodies were predominantly located in the focal plane and were captured (the last picture).

Fig 1b

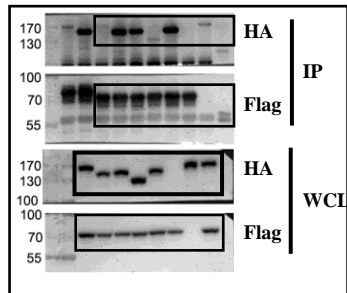

Fig 1c

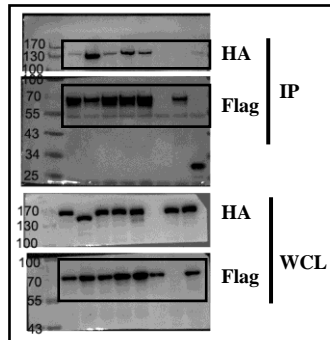

Fig 1d

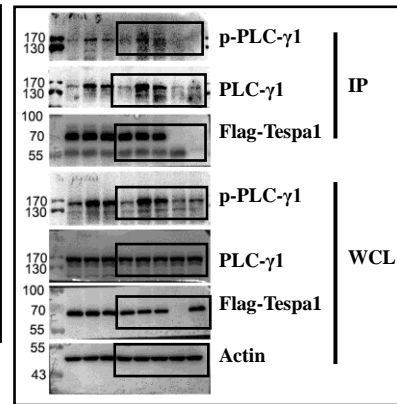

Figure 2a

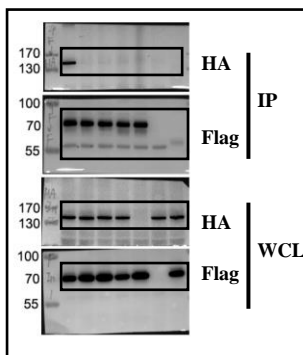

Figure 2b

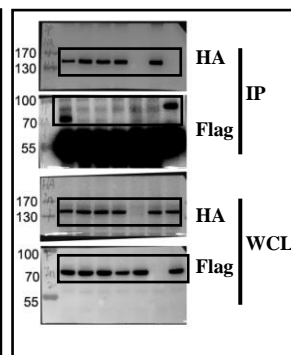

Figure 2c

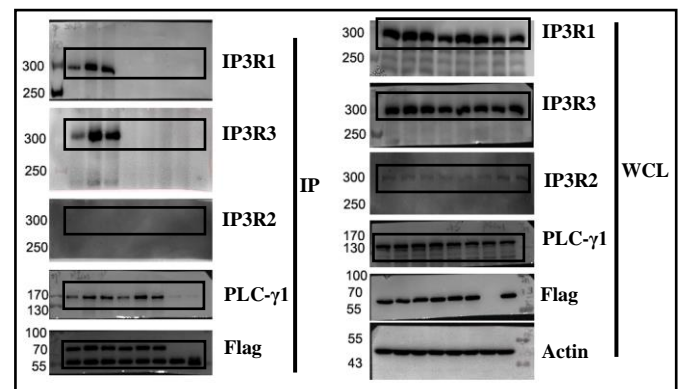

Fig 4d

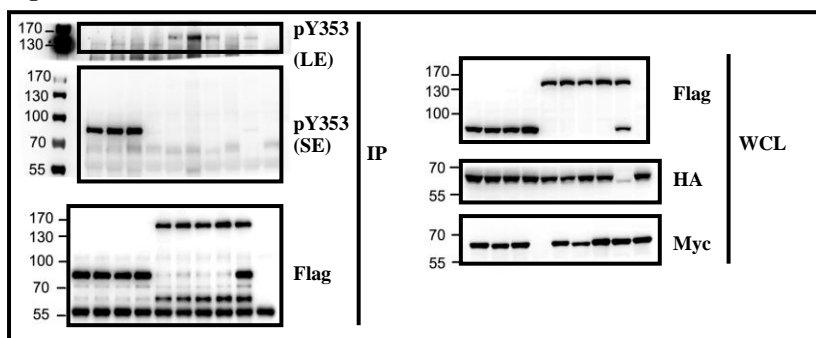

Supplementary Figure 1b

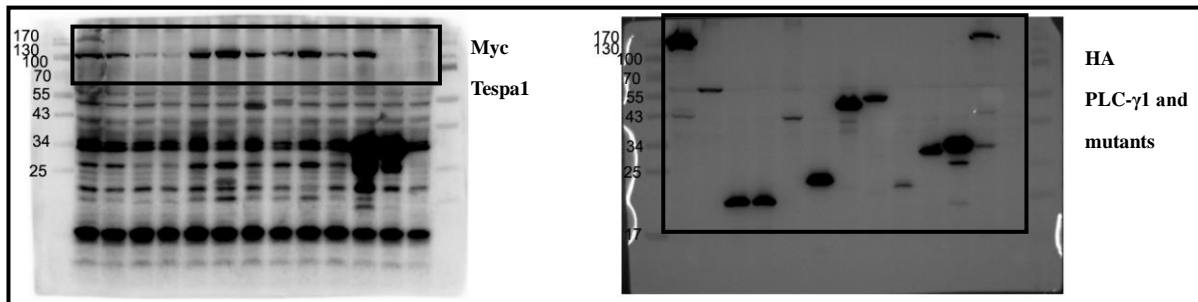

Supplementary Figure 2c

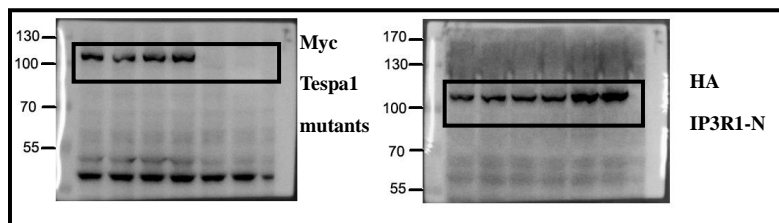

Supplementary Figure 3

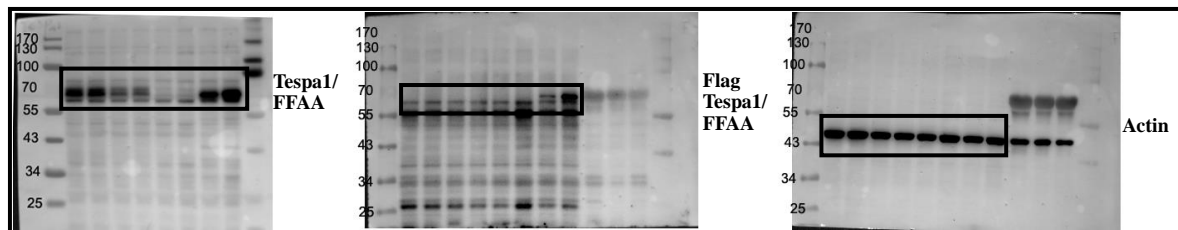

Supplementary Figure 6

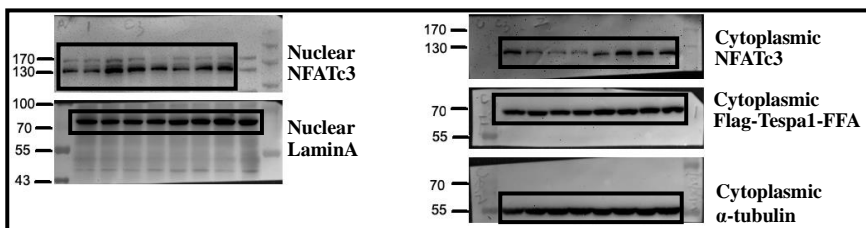

Supplementary Figure 7

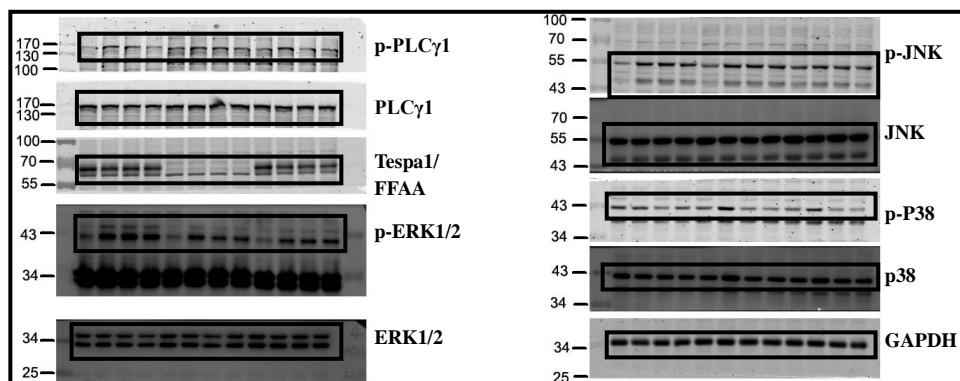

Supplementary Figure 12. Uncropped scans of the western blots related to Supplementary Figure 1-3, 6-7.
